# Supplementary material
Source: Springer Nature journal article supplement (https://www.springermedizin.de/resource/supplementary/12913_2011_2004_MOESM1_ESM.pdf/9530690)
Supplement: MOESM1 [file 9530690]

**Structure indicators (system-centered):**

- Hospital (4 hospitals; 3 dummy variables)
- Unit type: (1) medical, (2) surgical, and (3) medical-surgical combined (2 dummy variables)
- Total nursing hours/patient-day
- Percentage of the total nursing hours/patient-day supplied by RNs

**Structure indicators (patient characteristics):**

- Percentage of patients aged 65 years or older
- Average CMI
- Percentage of patients with altered mental status/cognitive impairment
- Percentage of patients with hearing problems

**Process indicator (patient-centered):**

Call light use rate/patient-day

**Process indicator (staff-centered):**

Average response time to call lights

**Dependent Variables**

**Outcome indicators (patient-centered):**

Fall rate/1000 patient-days

Injurious fall rate per 1000/ patient-days

+
